# Supplementary material for: Characterization of a novel LQT3 variant with a selective efficacy of mexiletine treatment
Source: PubMed Central journal article supplement (PMC6736863; doi:10.1038/s41598-019-49450-0), 2019-09-10

# Characterization of a novel LQT3 variant with a selective efficacy of mexiletine treatment

Kim: Functional study of a novel LQT3 mutation

Hyun-Ji Kim<sup>1,3\*</sup>, Bok-Geon Kim<sup>2,3\*</sup>, Jong Eun Park<sup>4</sup>, Chang-Seok Ki<sup>5</sup>, June Huh<sup>6</sup>, Jae Boum Youm<sup>7</sup>, Jong-Sun Kang<sup>2,3</sup>, Hana Cho<sup>1,3</sup>

<sup>1</sup>Department of Physiology, <sup>2</sup>Department of Molecular Cell Biology, <sup>3</sup>Single Cell Network Research Center, Sungkyunkwan University, Suwon, Korea; <sup>4</sup>Department of Laboratory Medicine, Hanyang University Guri Hospital, Hanyang University College of Medicine, Guri, Republic of Korea; <sup>5</sup>GC Genome, Yongin, Republic of Korea; <sup>6</sup>Division of Pediatric Cardiology, Department of Pediatrics, Samsung Medical Center, Sungkyunkwan University School of Medicine, Seoul, Korea; <sup>7</sup>Department of Physiology, College of Medicine, Cardiovascular and Metabolic Disease Center, Inje University, Busan, Korea.

\* These authors contributed equally to this work.

## Corresponding author address:

Prof. Hana Cho MD, PhD

Department of Physiology, Sungkyunkwan University School of Medicine, 2066, Seobu-Ro, Jangan-gu, Suwon, Gyunggi-do, Korea 16419

Phone: +82-31-299-6104,

E-mail address: [hanacho@skku.edu](mailto:hanacho@skku.edu)

## Total number of supplementary materials: 8

Supplementary figure legends: 1

Supplementary figure: 10

## Supplementary Figure Legends

### Supplementary Figure 1. Comparison of channel activity of WT and A1656D mutants at RT or 34°C .

**A.** Whole-cell Na<sup>+</sup> channel currents were measured from HEK293T cells expressing WT or A1656D Nav1.5 with the  $\beta$ 1 subunits at -20 mV (500 ms pulses applied from -120 mV holding potential at 0.2 Hz) at room temperature (left) or 34°C (right) . WT and A1656D currents normalized to peak current and superimposed at high (right) and low (inset) gain. **B.** Bar graph representing mean  $\pm$  S.E.M. percentage of current remaining at 500ms with respect to peak current for both WT and A1656D Nav1.5 at room temperature (left) or 34°C (right) . **C.** The current-voltage (I-V) relationship for WT and A1656D currents at room temperature (left) or 34°C (right). **D.** Steady-state inactivation curves and steady-state activation curves were measured with WT and A1656D at room temperature (left) or 34°C (right). The shapes of voltage step pulses are included as a figure inset. \*  $p < 0.05$ , \*\*  $p < 0.01$ , Student's t-test.

### Supplementary Figure 2. The effects of mexiletine (10 $\mu$ M) on inactivation time constants of A1656D SCN5A in HEK293T cells. Data represent mean $\pm$ S.E.M. \*\* $P < 0.01$ , \*\*\* $P < 0.001$ , Paired Student's t-test.

The fast and slow time constants (Tau1, Tau2) for inactivation are plotted for A1656D Na<sup>+</sup> channel before and after mexiletine treatment.

### Supplementary Figure 3. Relative sensitivities of A1656D Nav1.5 channel current to Na<sup>+</sup> channel blockers at 34°C. A,B,C. A1656D Nav1.5 currents before (black in each panel) and after 10 $\mu$ M mexiletine

(A; magenta), 1  $\mu$ M flecainide (B; blue), or 50  $\mu$ M ranolazine (C; red).  $I_{Na}$  was elicited by a 500 ms step depolarization from -120 mV to -20 mV. **D.** The proportion of  $I_{Na}$  remaining at 500 ms after treatment with mexiletine, flecainide, or ranolazine was normalized to  $I_{Na}$  in control solutions. Bar graph representing mean  $\pm$  S.E.M. \*  $p < 0.05$ , \*\*\*  $p < 0.001$ , Student's t-test.

### Supplementary Figure 4. Relative sensitivities of late $I_{Na}$ of WT Nav1.5 channel to Na<sup>+</sup> channel blockers. A,B,C. WT Nav1.5 currents before (black in each panel) and after 10 $\mu$ M mexiletine (A; magenta),

1  $\mu$ M flecainide (B; blue), or 50  $\mu$ M ranolazine (C; red).  $I_{Na}$  was elicited by a 500 ms step depolarization from -120 mV to -20 mV. **D.** The proportion of  $I_{Na}$  remaining at 500 ms after treatment with mexiletine, flecainide, or ranolazine was normalized to  $I_{Na}$  in control solutions. Bar graph representing mean  $\pm$  S.E.M. NS, non significant.

### Supplementary Figure 5. Representative current traces of WT and A1656D Nav1.5 channel in a simulation. A. $I_{Na}$ of WT (left) is compared with that of A1656D Nav1.5 channel (right). B-D. Simulated

effects of mexiletine (B), flecainide (C), and ranolazine (D) on  $I_{Na}$  of A1656D mutants. The same pulse protocol in Figure 3F is employed to simulate depolarization-activated membrane currents carried by A1656D channel.

**Supplementary Figure 6. Comparison of experimental and simulated I-V relationships of WT and A1656D mutants.** . IV curves are compared between simulation and cell experiment. They are similar in the voltage-dependence and relative conductance. The A1656D mutation shifts the voltage-dependence to the left and increases the current amplitude in both simulation and cell experiment. Mexiletine reduces the current amplitude and shifts the voltage-dependence further to the left while flecainide and ranolazine have minimal effects on the voltage-dependence and current amplitude.

**Supplementary Figure 7. Effects of stimulation frequency on action potentials in virtual human ventricular myocytes with WT SCN5A or A1656D mutant.** APD50 (A) and APD90 (B) calculated at different stimulation frequencies (0.5, 1, and 2Hz) in virtual human ventricular myocytes with WT or A1656D SCN5A. 60 s of stimulation were applied before taking action potential parameters.

**Supplementary Figure 8. Mexiletine reduced APDs of human cardiac myocytes model with A1656D SCN5A in a dose-dependent manner.** **A.** Simulation of the effects of mexiletine on APs of human ventricular myocytes. **B.** Simulation of the effects of mexiletine on APs of human atrial myocytes.

**Supplementary Figure 9 . Flecainide and ranolazine enhance  $I_{Na}$  during repolarization of human ventricular myocytes in a simulation.** Upper panels in A and B represent membrane potential while lower panels represent  $I_{Na}$ .

**Supplementary Figure 10. Flecainide and ranolazine enhance  $I_{Na}$  during repolarization of human atrial myocytes in a simulation.** Upper panels in A and B represent membrane potential while lower panels represent  $I_{Na}$ .

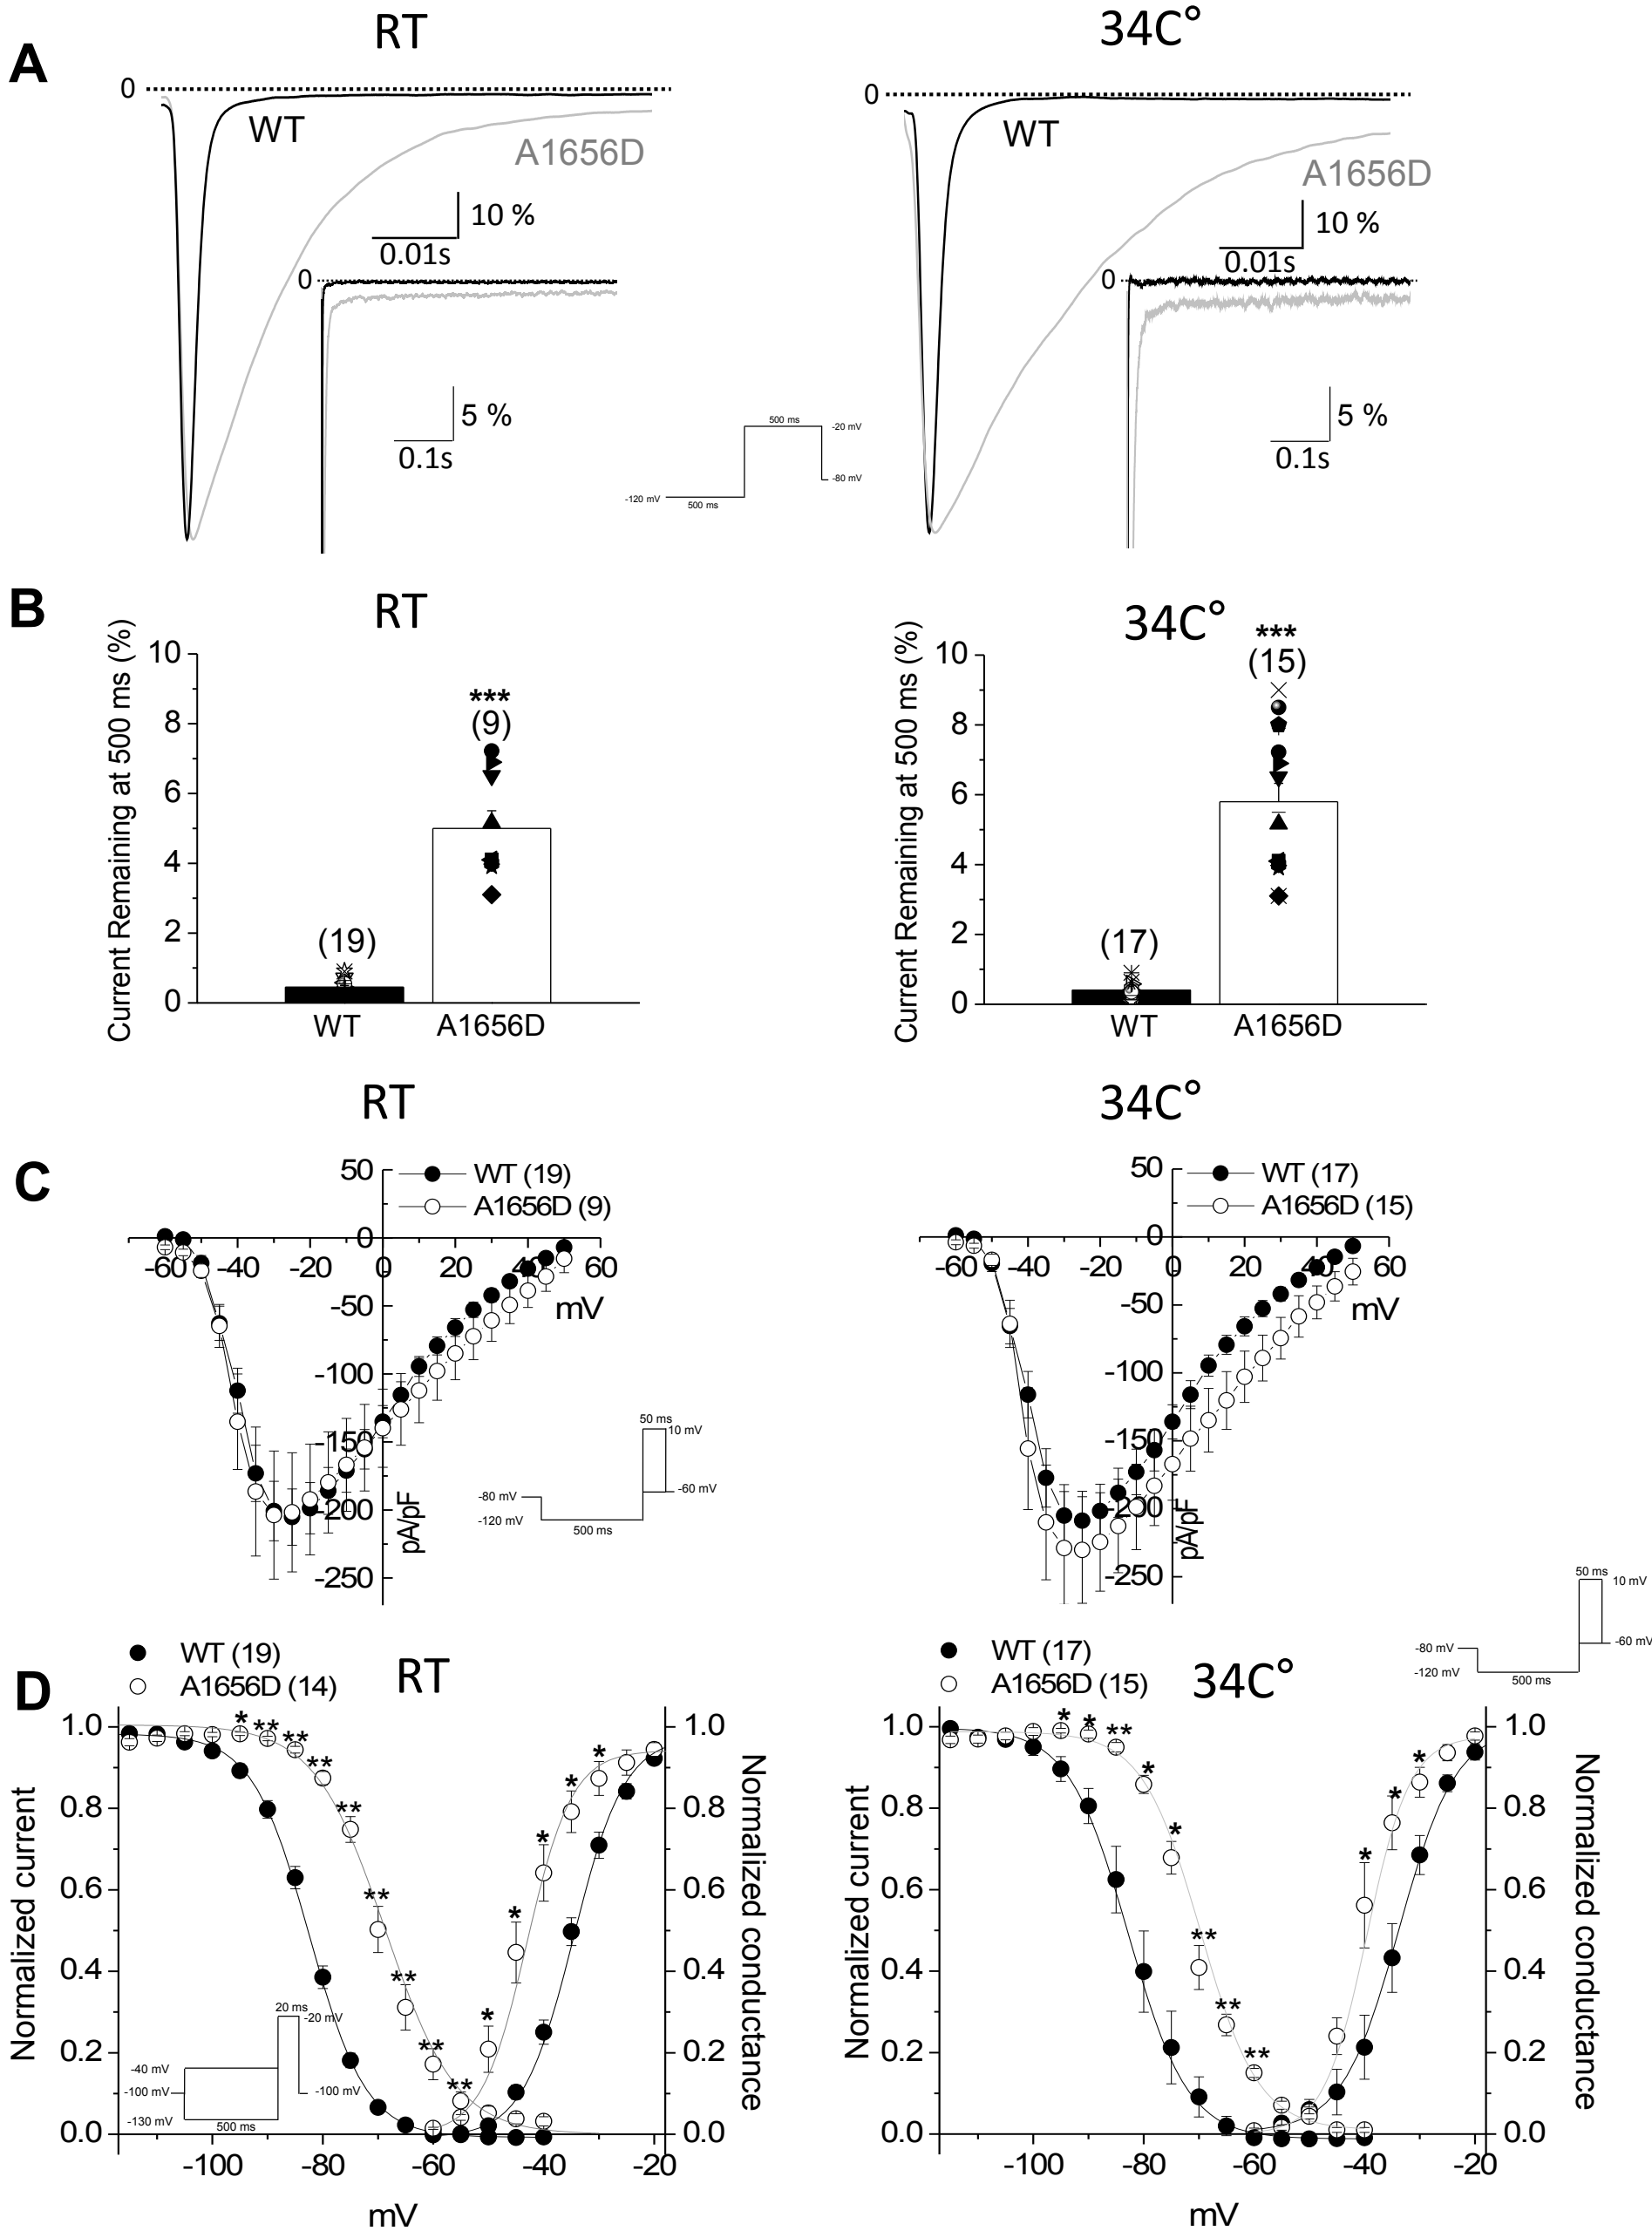

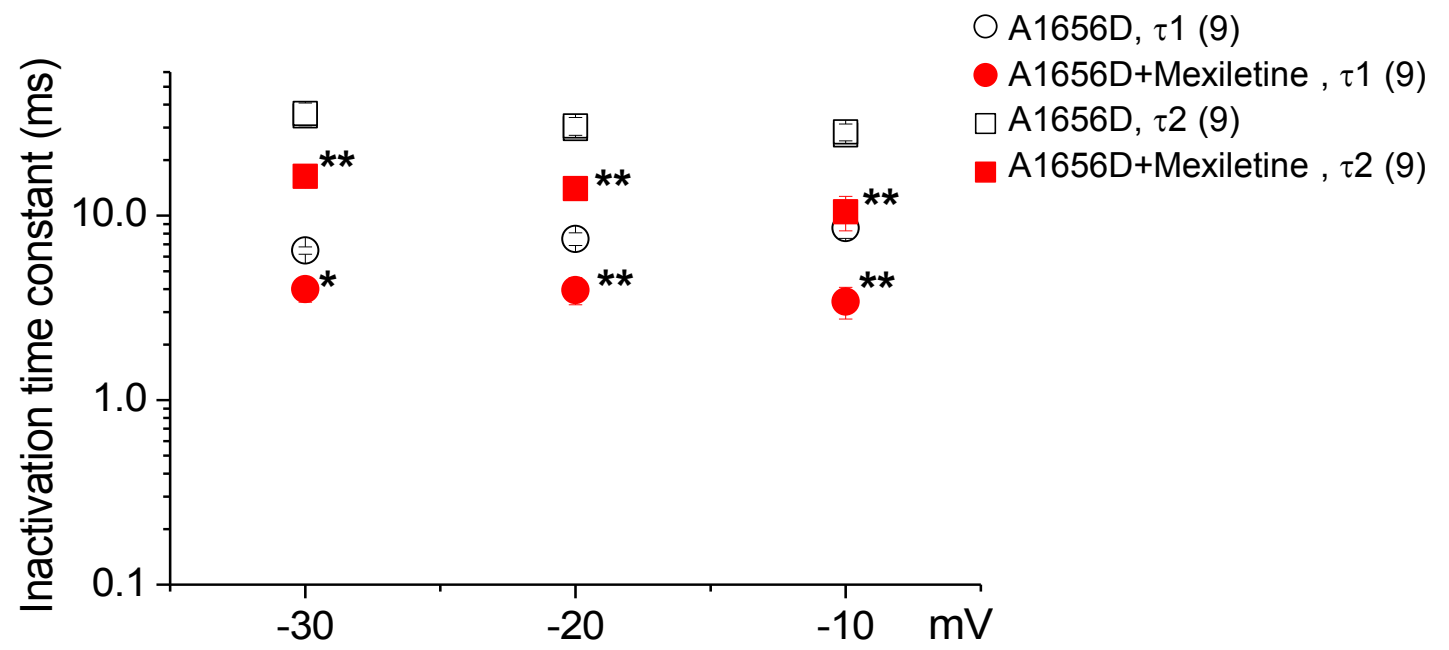

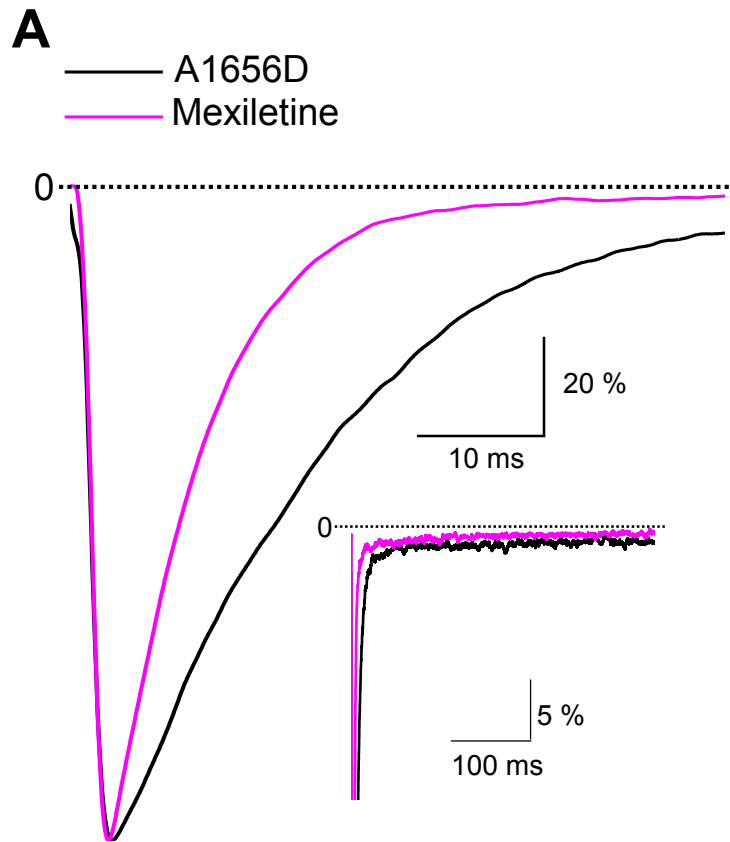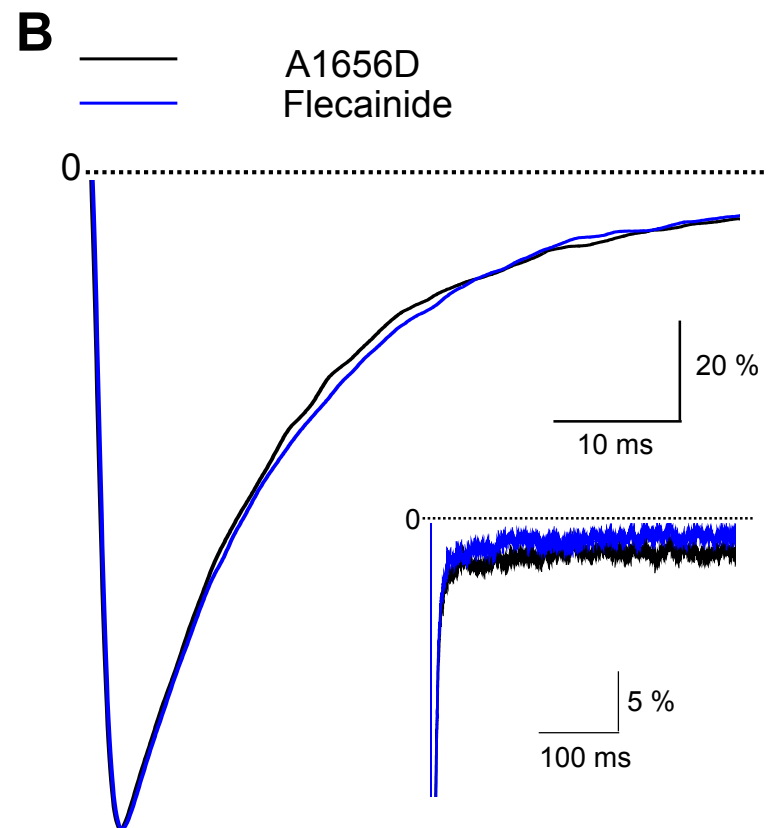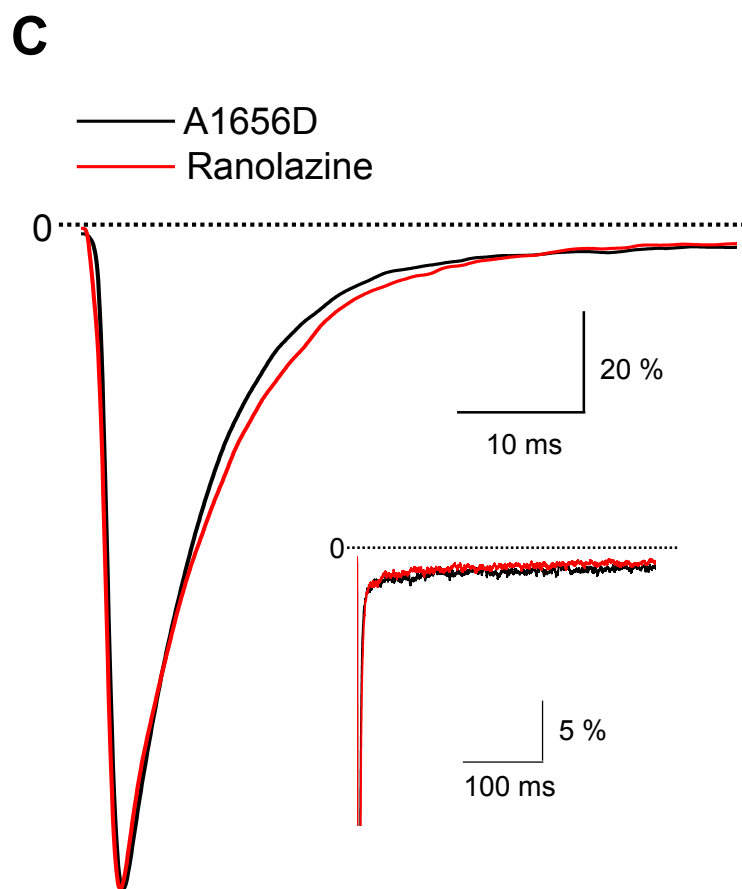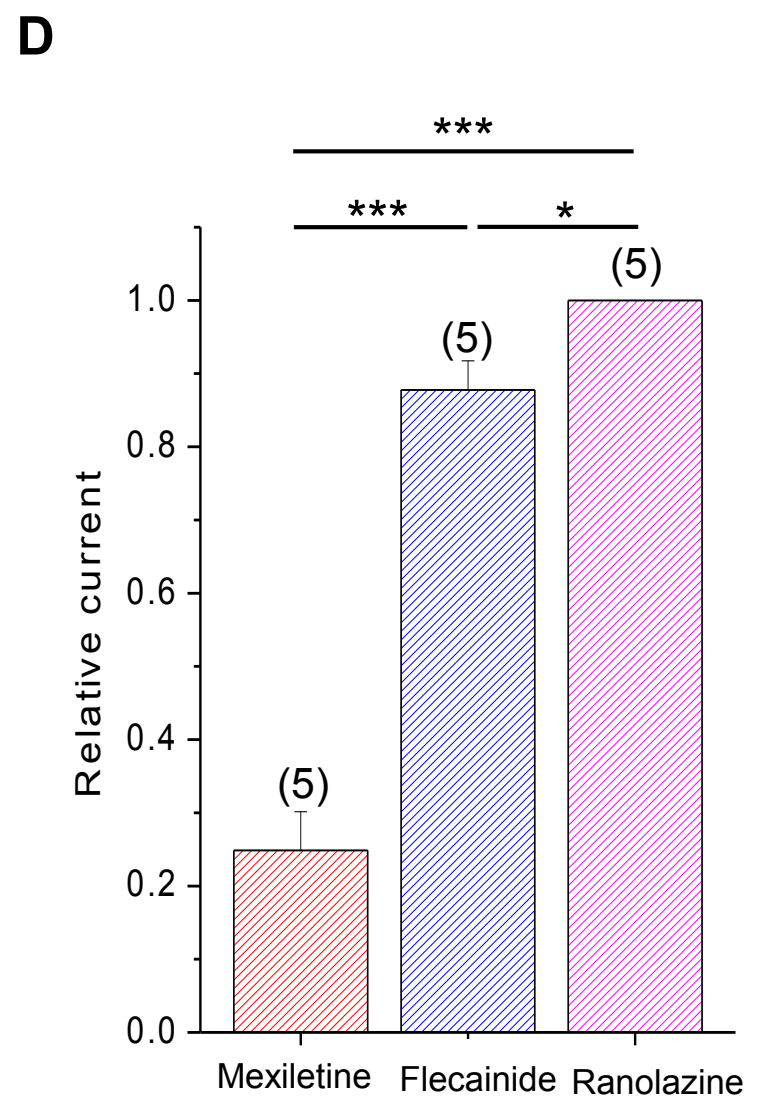

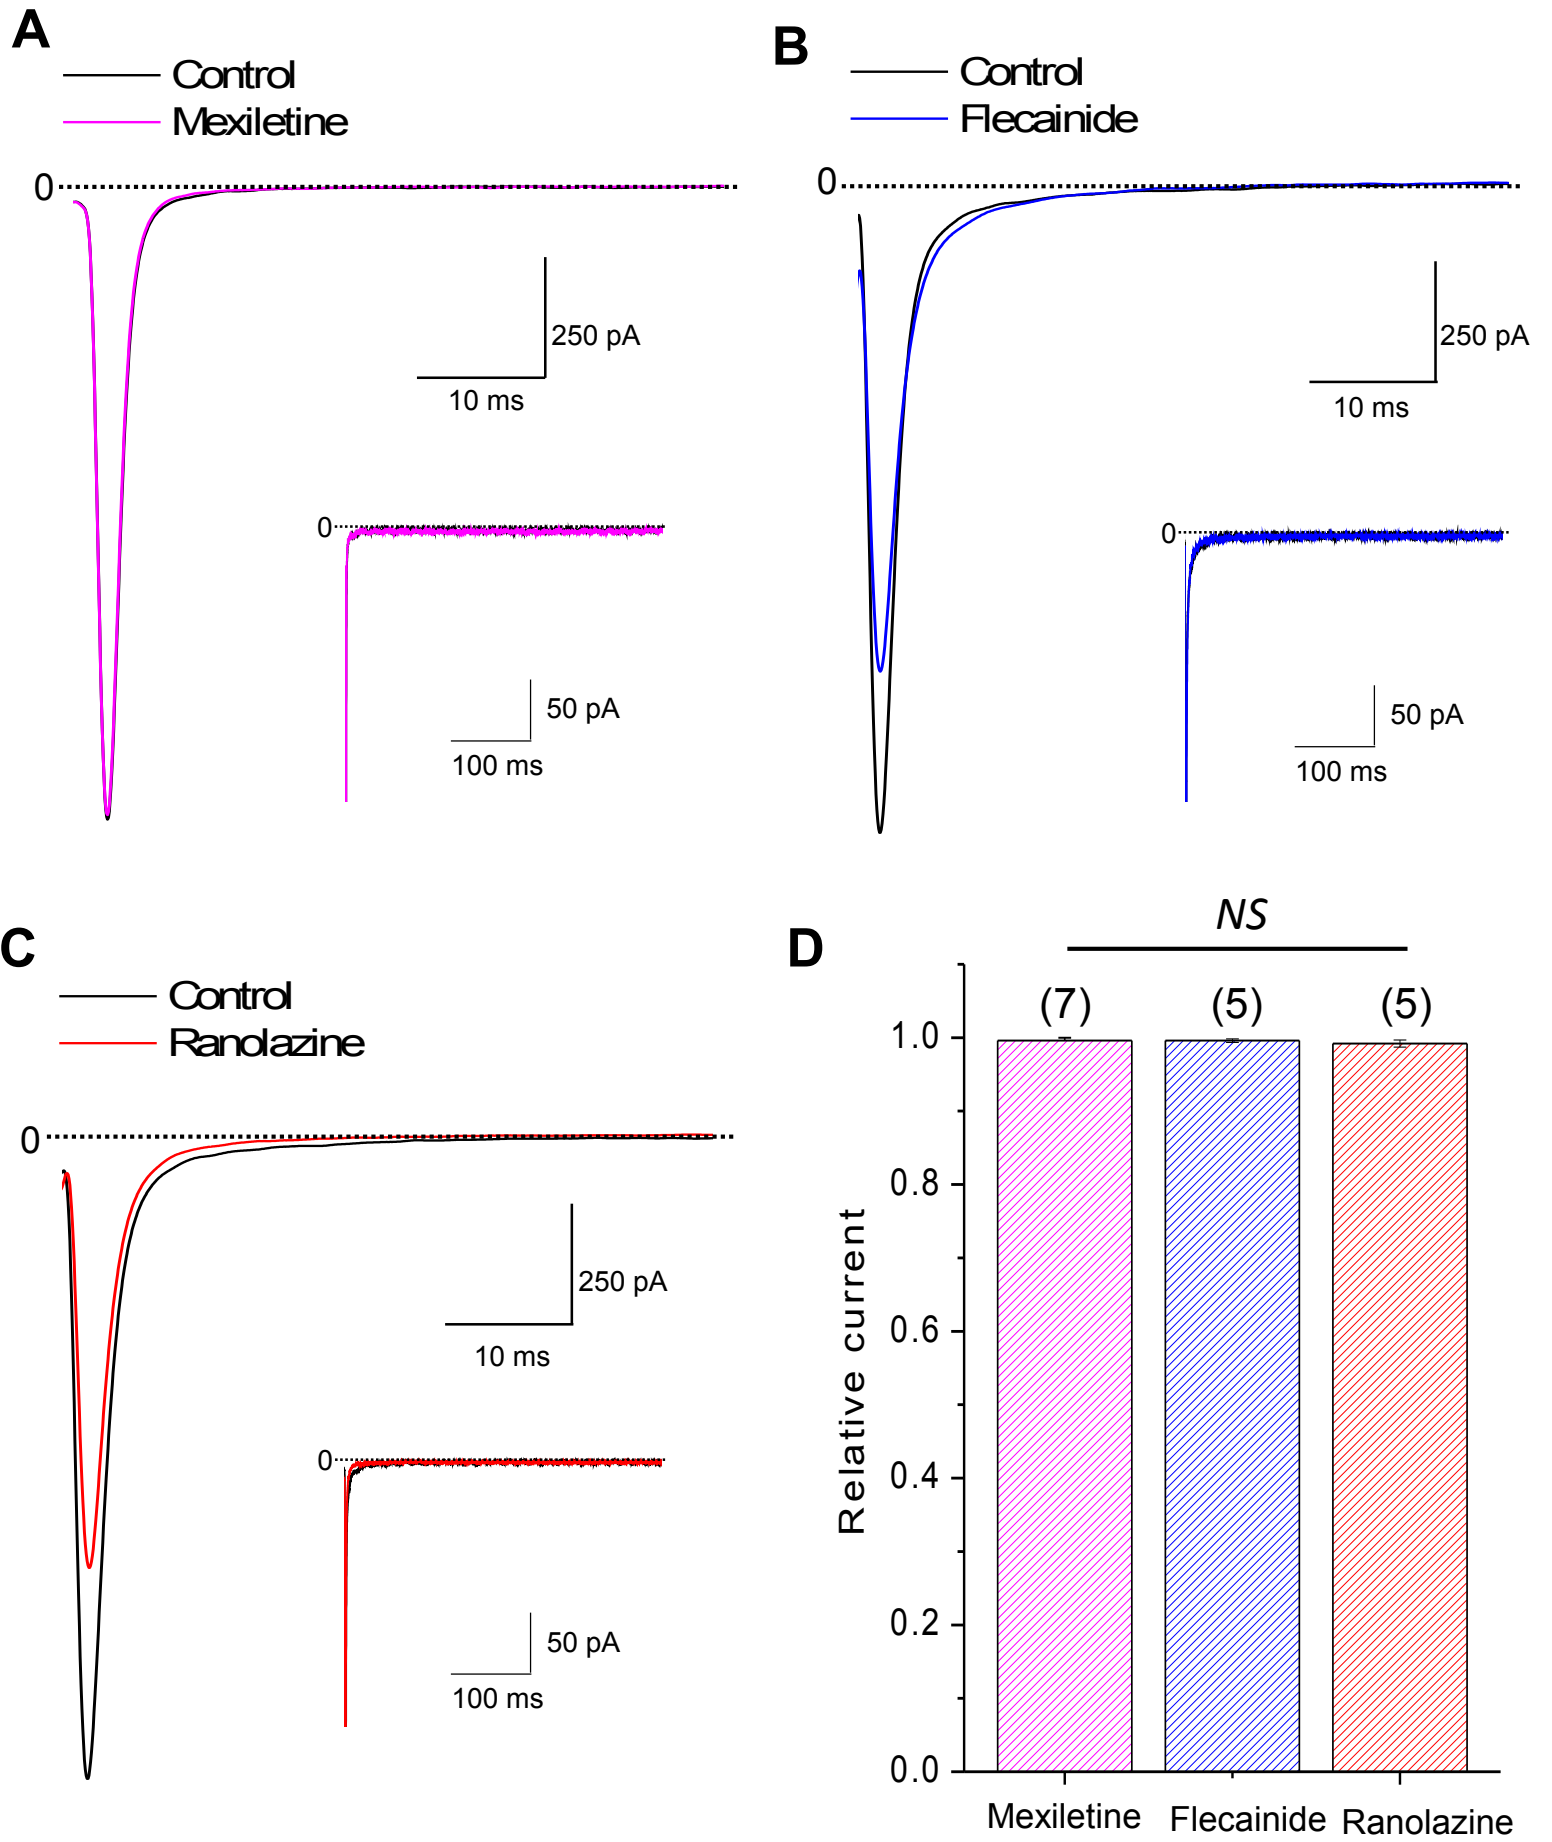

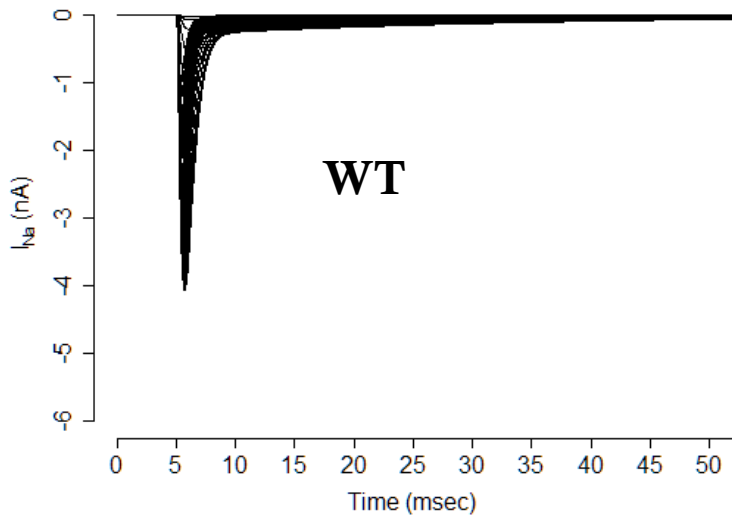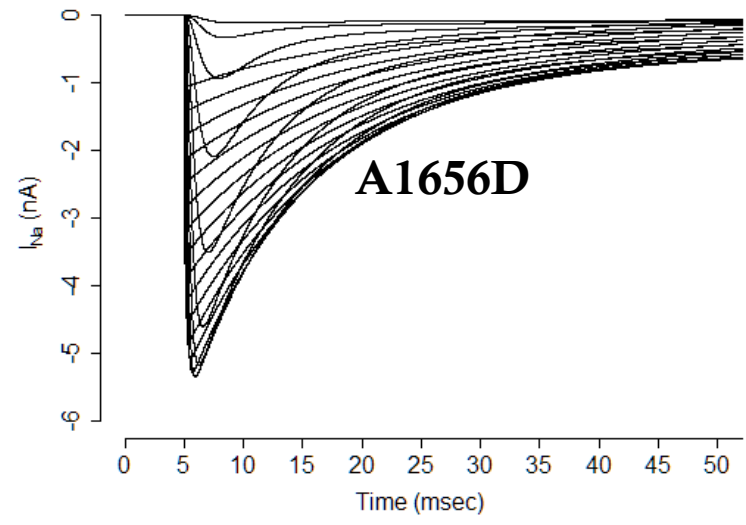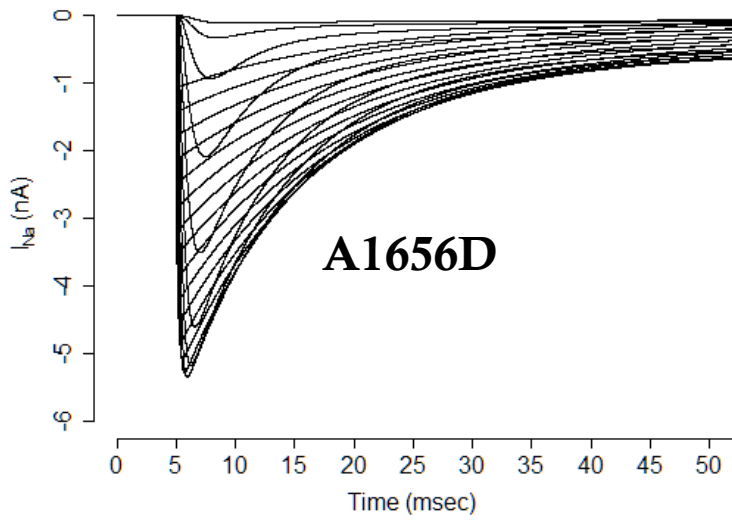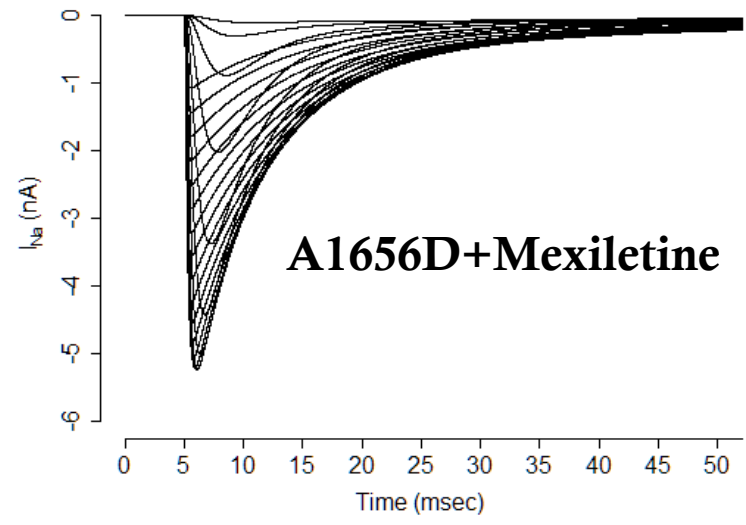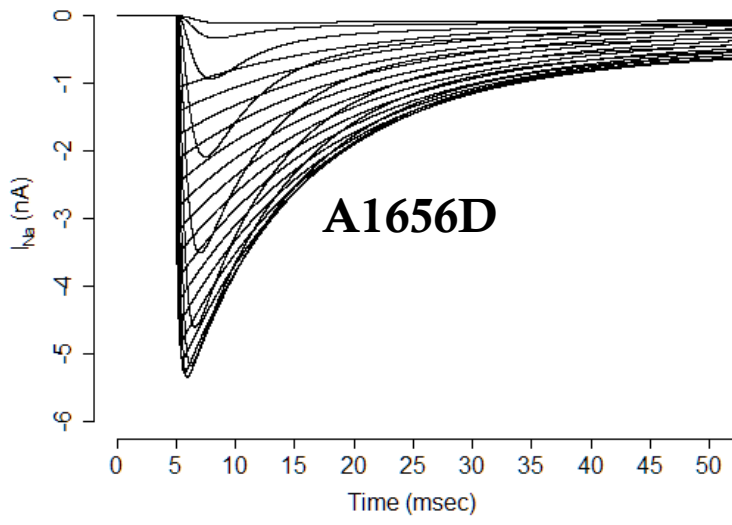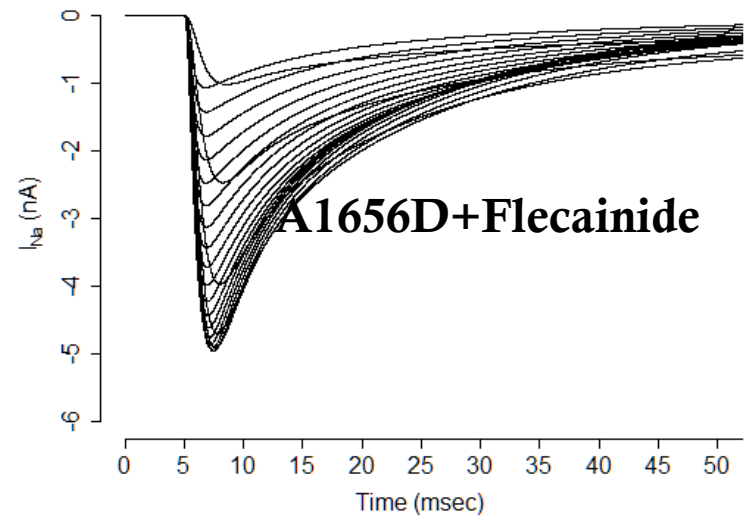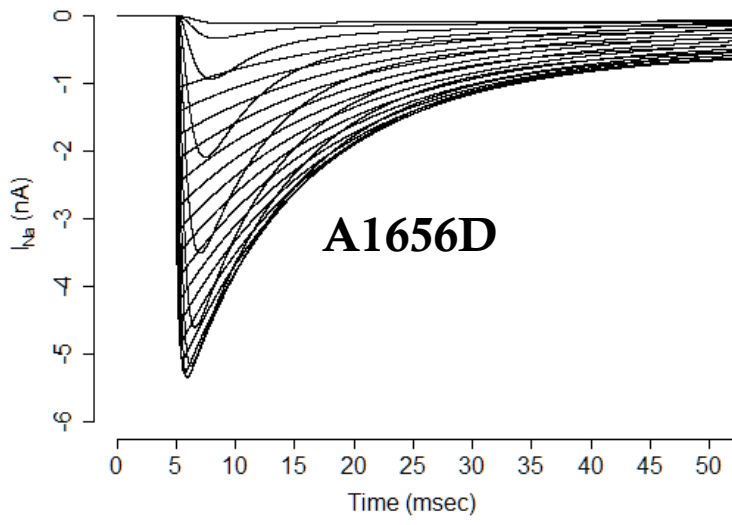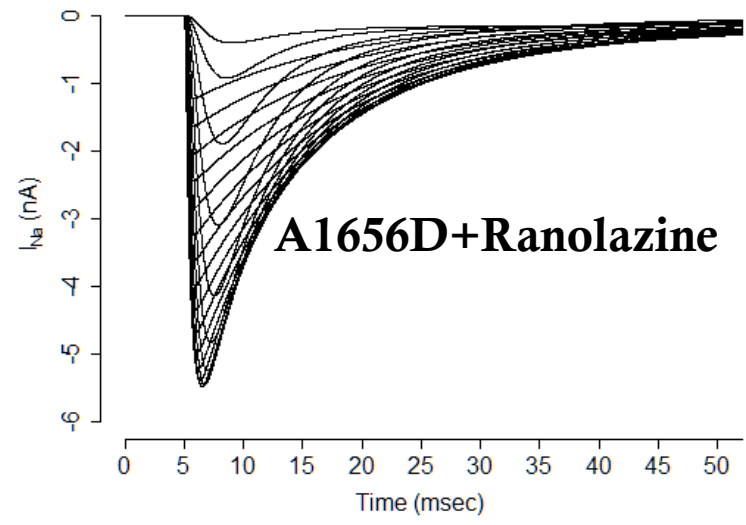



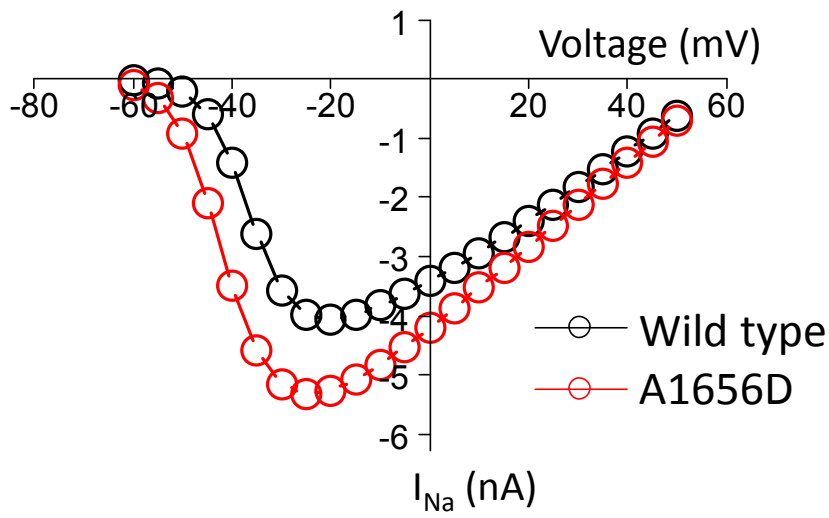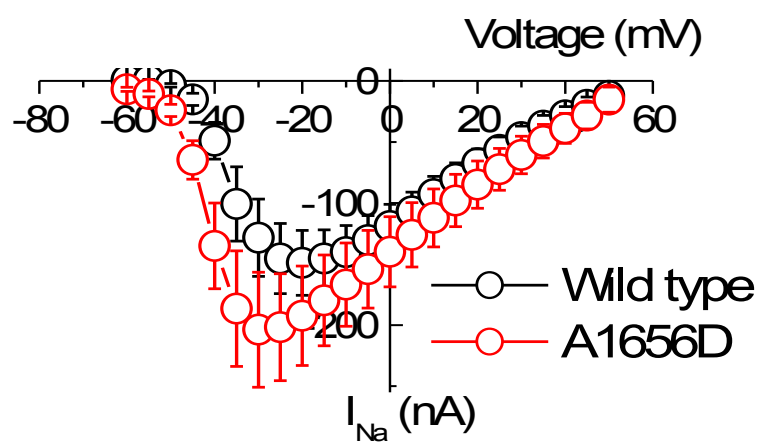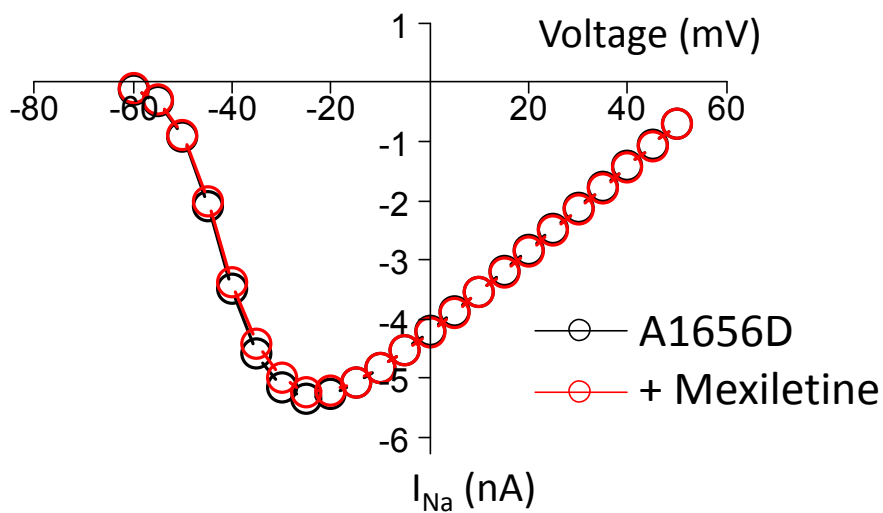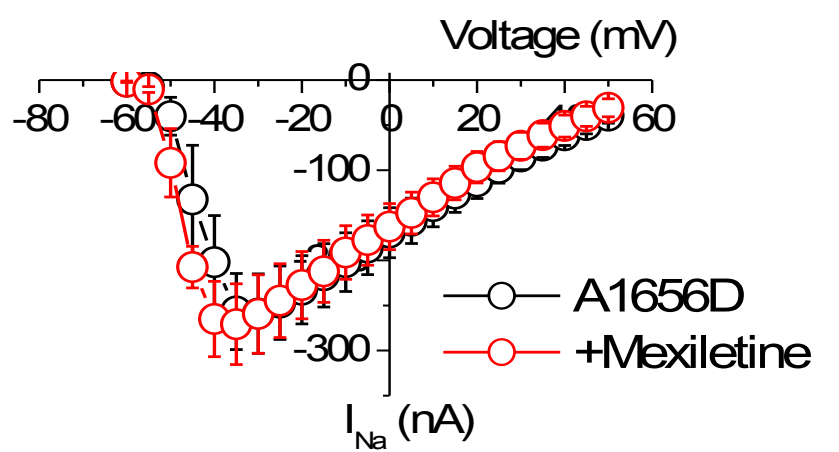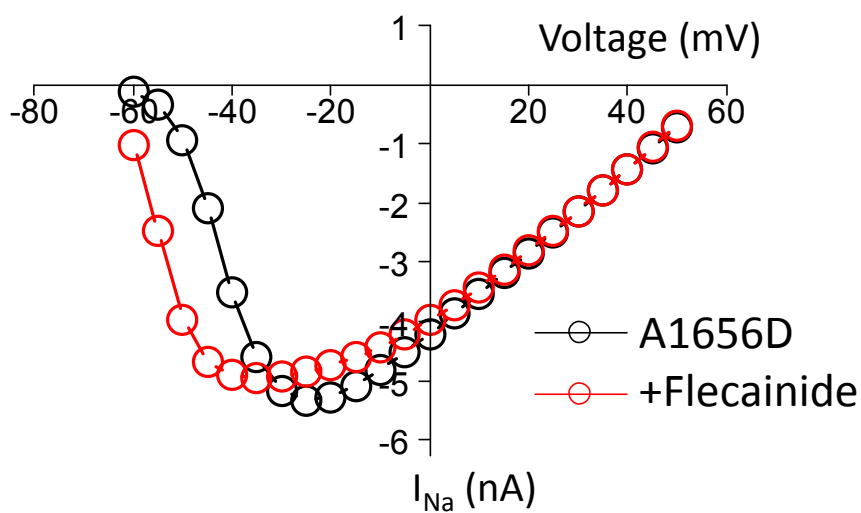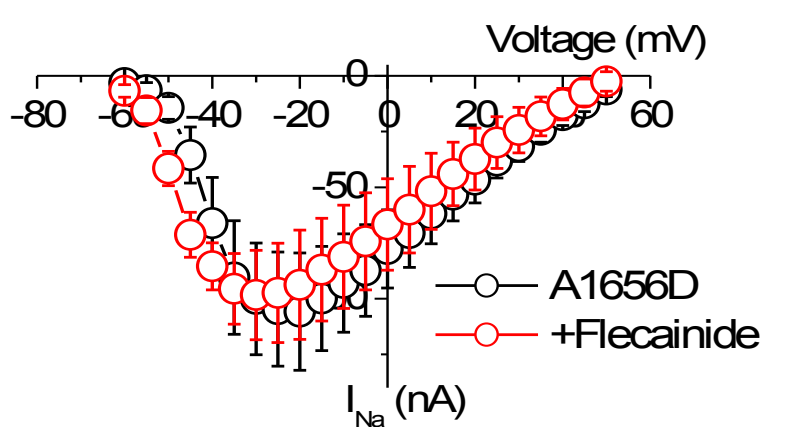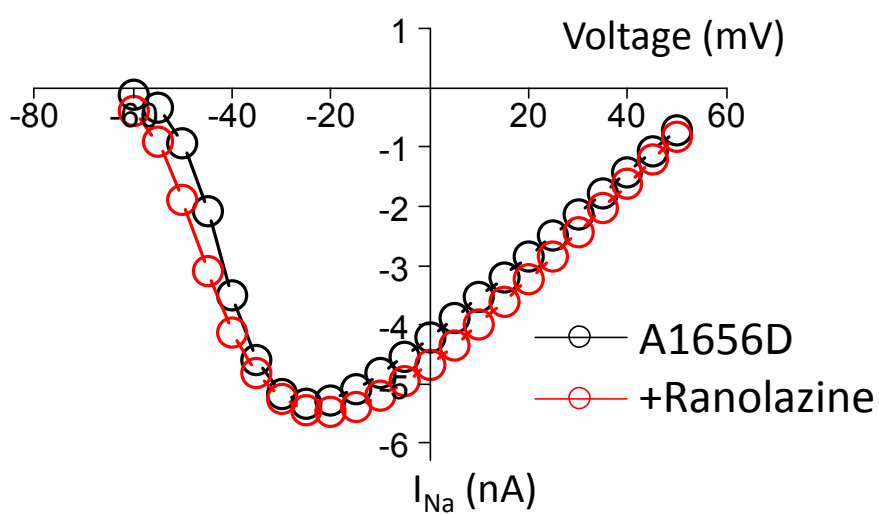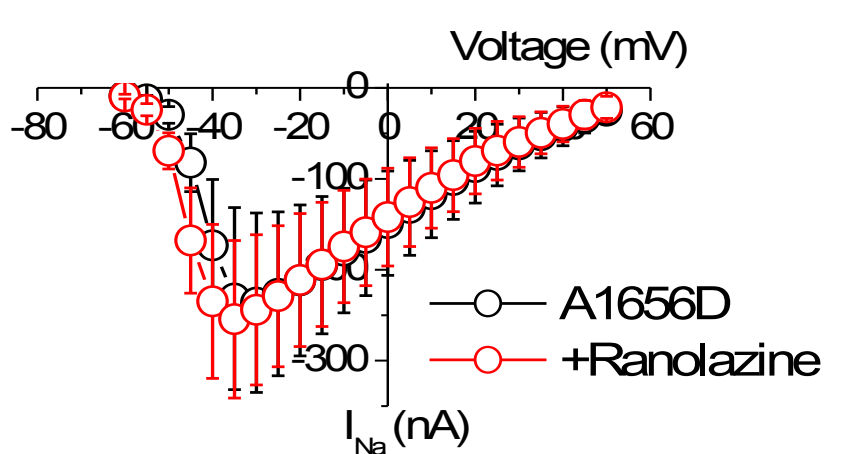

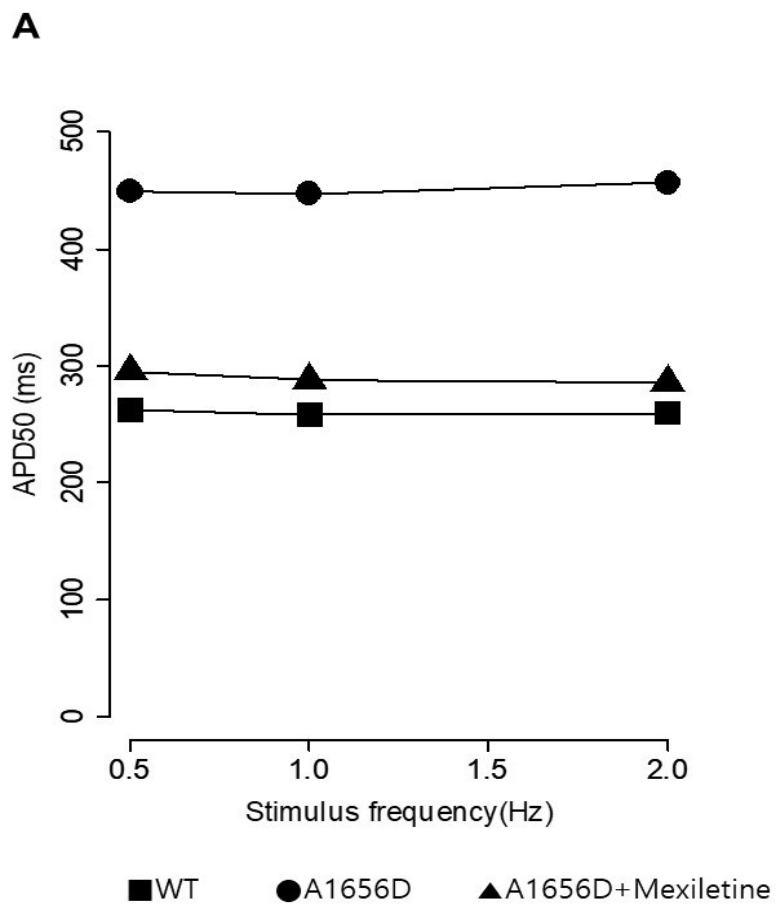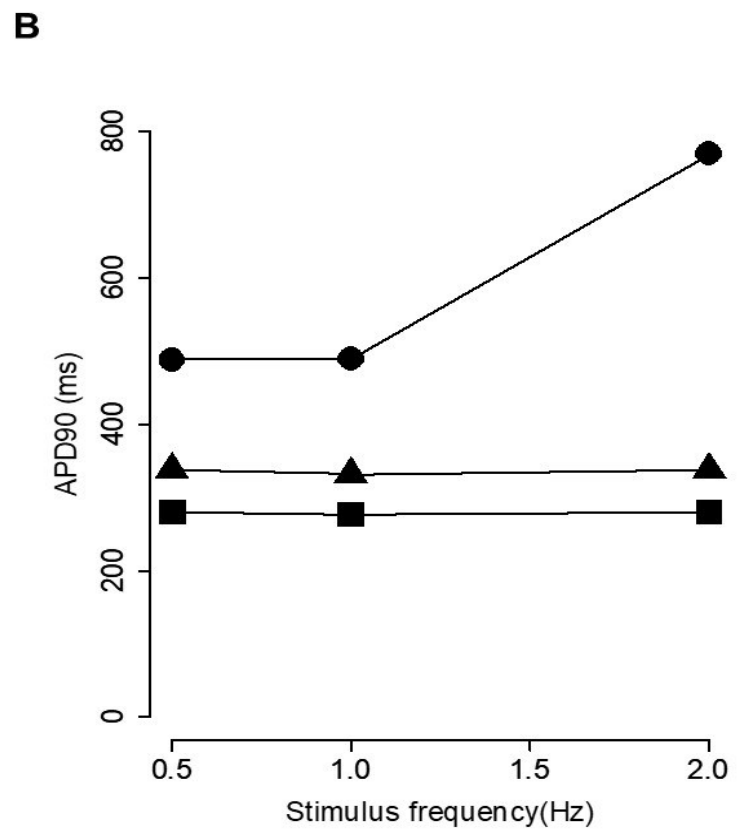

Ventricular myocyte model

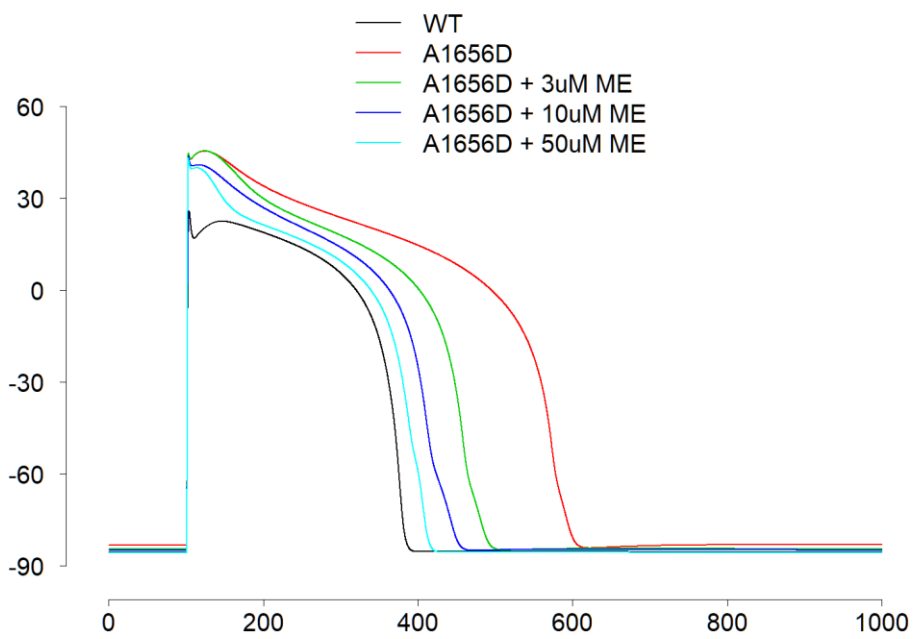

Atrial myocyte model

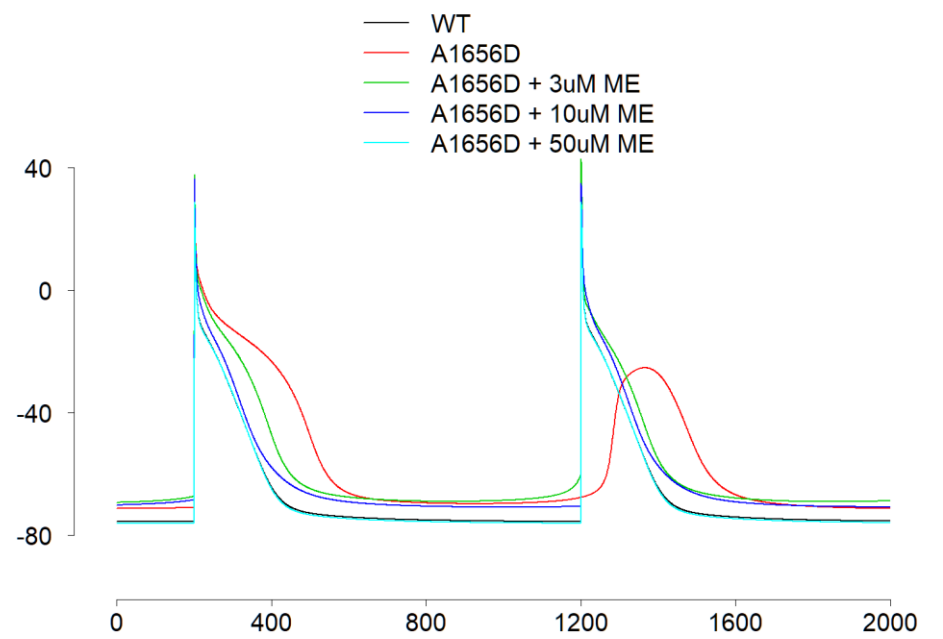

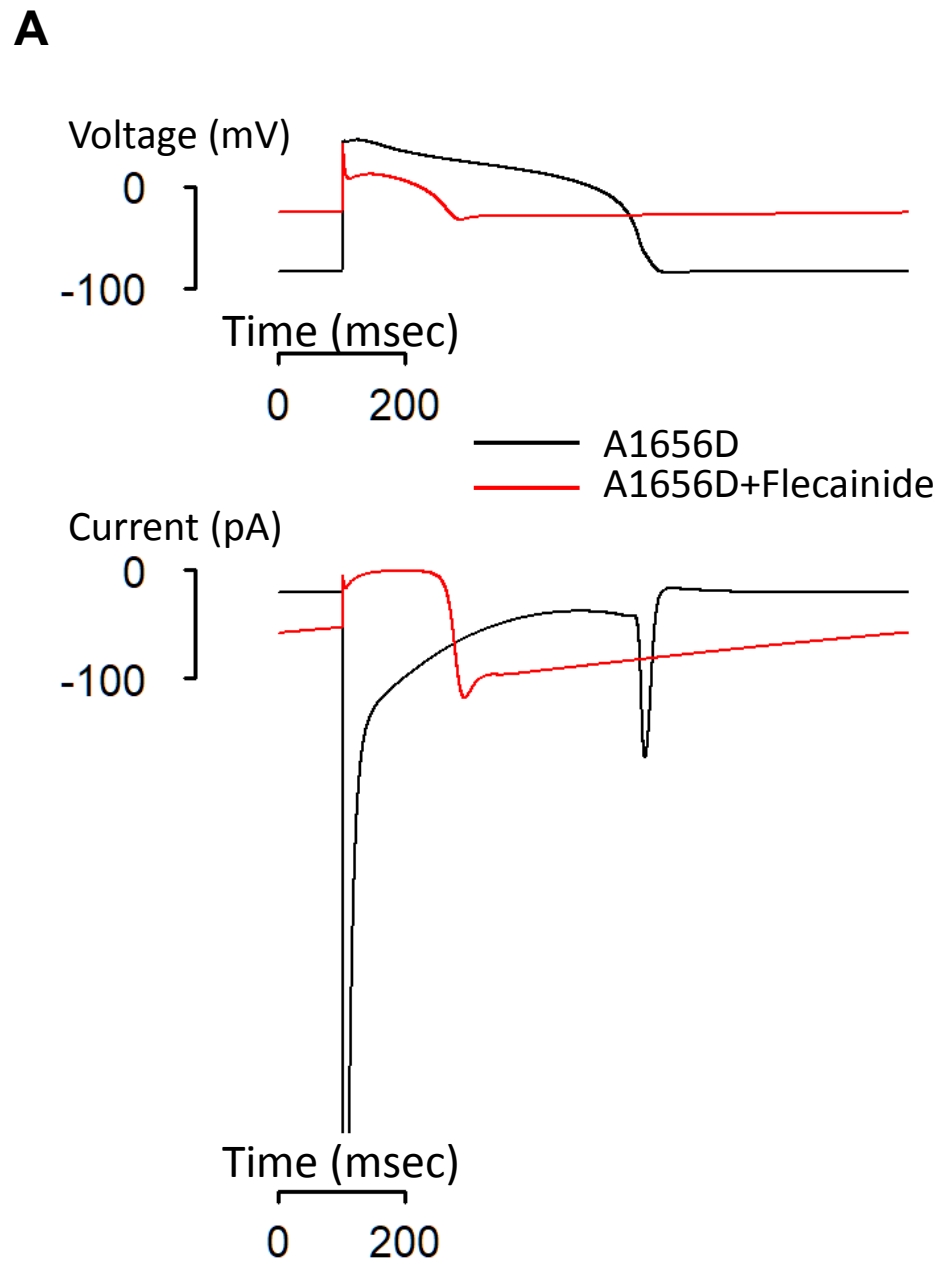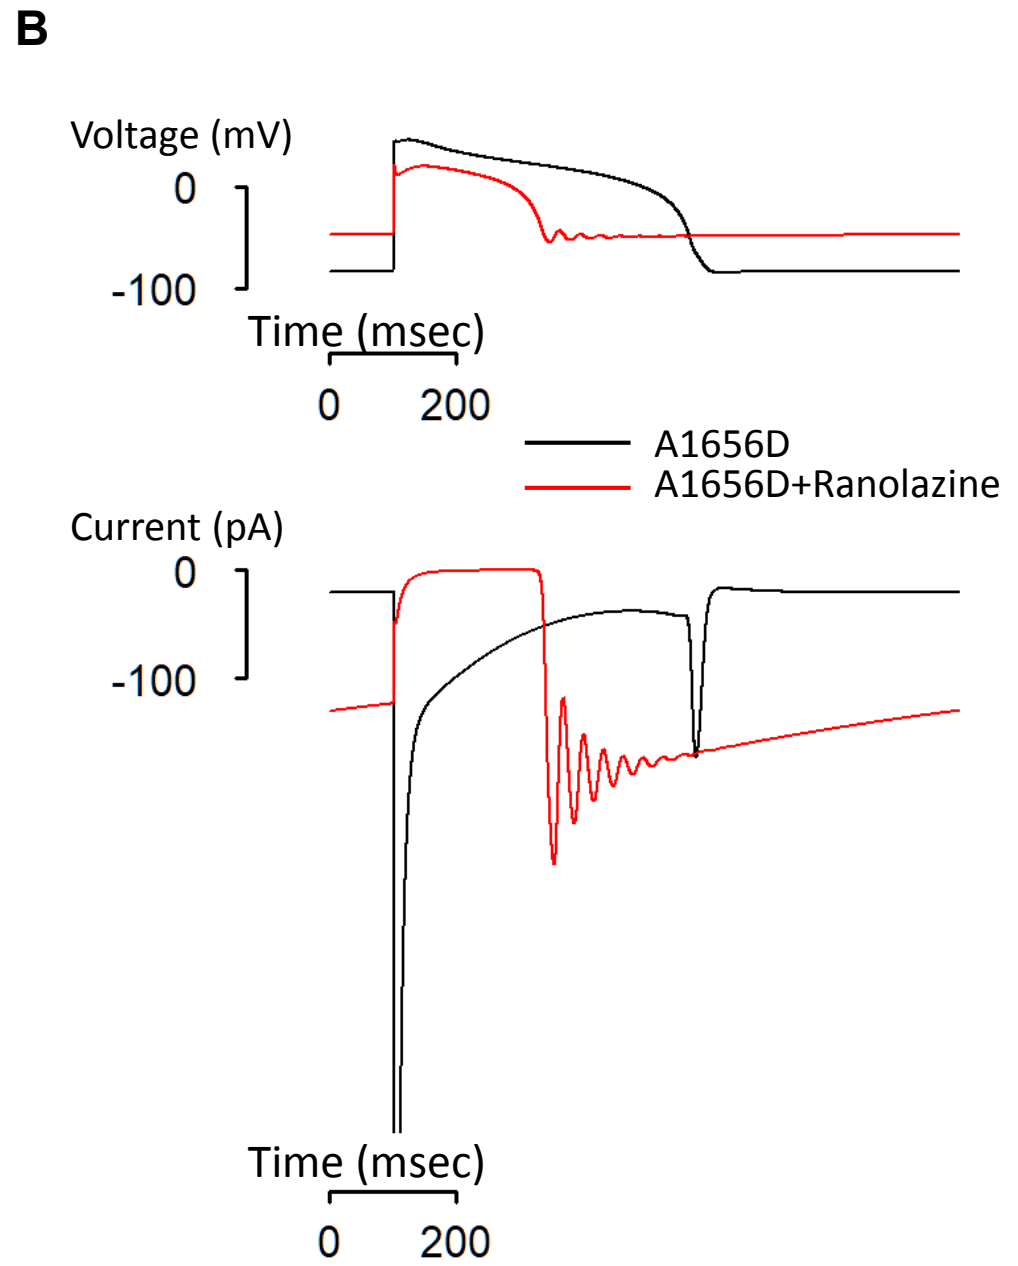

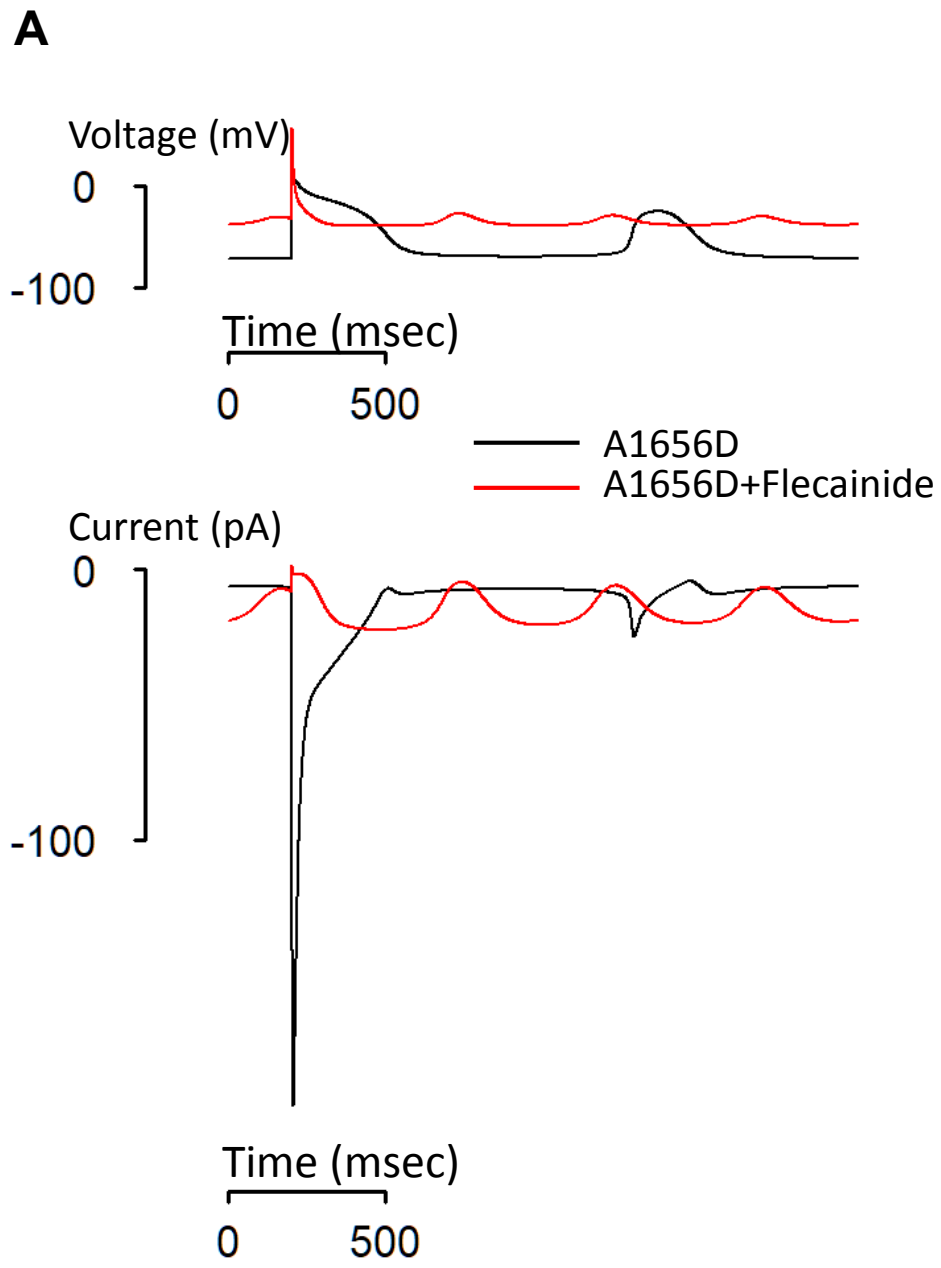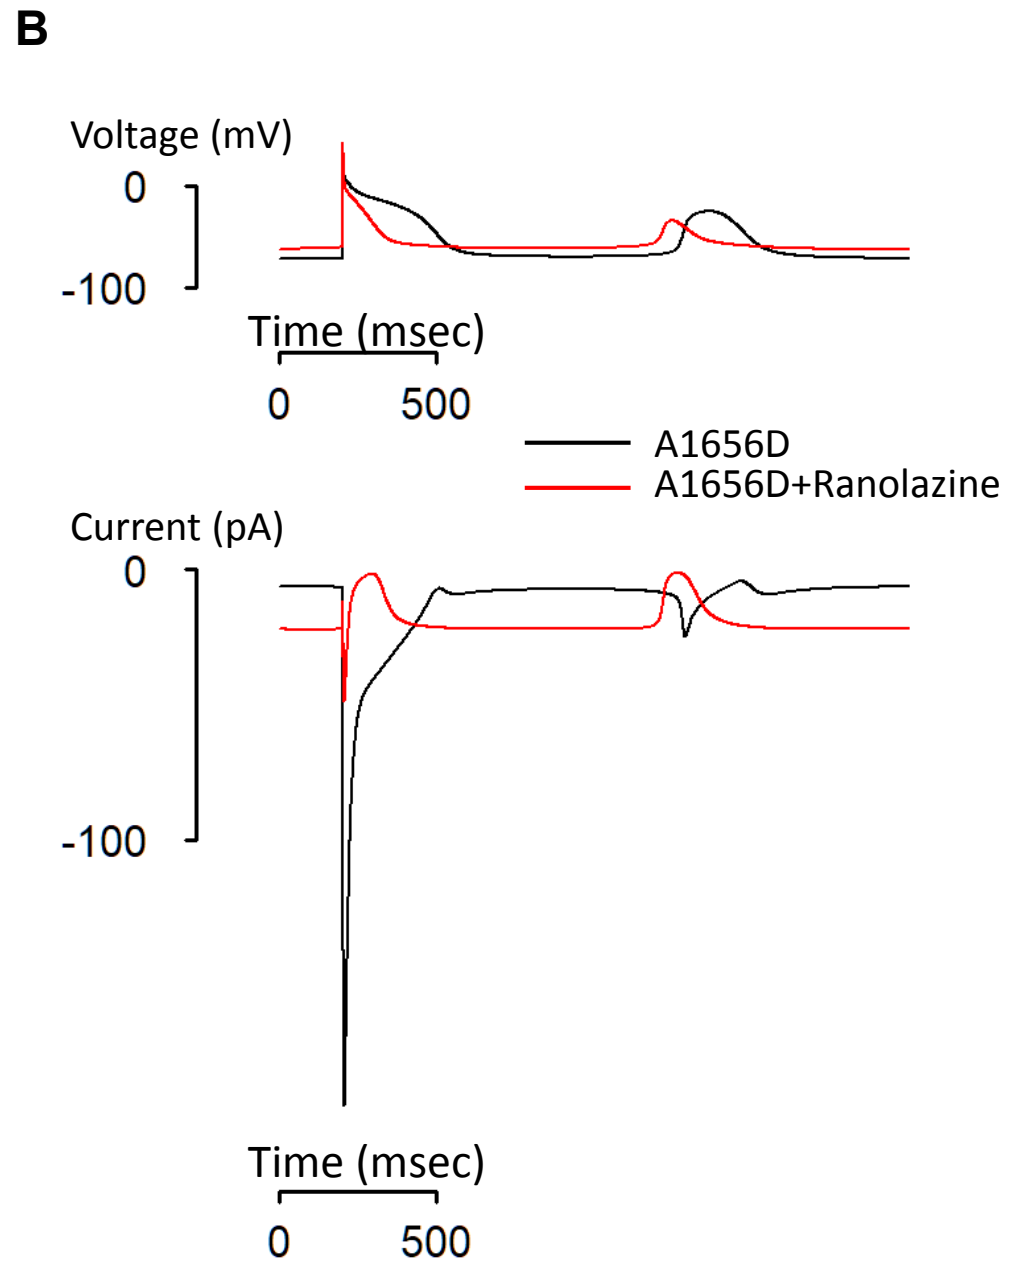

Supplement: 41598_2019_49450_MOESM1_ESM.pdf [file 41598_2019_49450_MOESM1_ESM.pdf]
