# Supplementary material for: Characterization of a novel LQT3 variant with a selective efficacy of mexiletine treatment
Source: PubMed Central journal article supplement (PMC6736863; doi:10.1038/s41598-019-49450-0), 2019-09-10
Supplement: 41598_2019_49450_MOESM2_ESM.pdf [file 41598_2019_49450_MOESM2_ESM.pdf]

# Characterization of a novel LQT3 variant with a selective efficacy of mexiletine treatment

Kim: Functional study of a novel LQT3 mutation

Hyun-Ji Kim<sup>1,3\*</sup>, Bok-Geon Kim<sup>2,3\*</sup>, Jong Eun Park<sup>4</sup>, Chang-Seok Ki<sup>5</sup>, June Huh<sup>6</sup>, Jae Boum Youm<sup>7</sup>, Jong-Sun Kang<sup>2,3</sup>, Hana Cho<sup>1,3</sup>

<sup>1</sup>Department of Physiology, <sup>2</sup>Department of Molecular Cell Biology, <sup>3</sup>Single Cell Network Research Center, Sungkyunkwan University, Suwon, Korea;

<sup>4</sup>Department of Laboratory Medicine, Hanyang University Guri Hospital, Hanyang University College of Medicine, Guri, Republic of Korea; <sup>5</sup>GC Genome, Yongin, Republic of Korea; <sup>6</sup>Division of Pediatric Cardiology, Department of Pediatrics, Samsung Medical Center, Sungkyunkwan University School of Medicine, Seoul, Korea; <sup>7</sup>Department of Physiology, College of Medicine, Cardiovascular and Metabolic Disease Center, Inje University, Busan, Korea.

\* These authors contributed equally to this work.

## Corresponding author address:

Prof. Hana Cho MD, PhD

Department of Physiology, Sungkyunkwan University School of Medicine, 2066, Seobu-Ro, Jangan-gu, Suwon, Gyunggi-do, Korea 16419

Phone: +82-31-299-6104,

E-mail address: [hanacho@skku.edu](mailto:hanacho@skku.edu)

# 1. PolyPhen-2

## Protein sequence in FASTA format:

>NP\_932173.1 sodium channel protein type 5 subunit alpha isoform a  
[Homo sapiens]

MANFLLPRGTSSFRRFTRESLAAIEKRMAEKQARGSTTLQESREGLPEEEAPRPQL  
DLQASKKLPDLYGNPPQELIGEPLDLPFYSTQKTFIVLNKGKTIFRFSATNALYVL  
SPFHPIRRAAVKILVHSLFNMLIMCTILTNCVFMAQHDPWPWKYVEYTFTAIYTFESL  
VKILARGFCLHAFTFLRDPWNWLDVSVIIMAYTTEFVDLGNVSALRTFRVLRALKTIS  
VISGLKTIVGALIQSVKKLADVMVLTVFCLSVFALIGLQLFMGNLRHKCVRNFTALNG  
TNGSVEADGLVWESLDLYLSDPENYLLKNGTSDVLLCGNSSDAGTCPEGYRCLKA  
GENPDHGYTSFDSFAWAFALFRLMTQDCWERLYQQTLRSAGKIYMIFFMLVIFLG  
SFYLVNLI LAVVAMAYEEQNQATIAETEEKEKRFQEAMEMLKKEHEALTIRGVDTVS  
RSSLEMSPLAPVNSHERRSKRRKRMSSGTEECGEDRLPKSDSEDGPRAMNHLSL  
TRGLSRTSMKPRSSRGSIFTFRRRDLGSEADFADDENSTAGESESHHTSLLVPWPL  
RRTSAQQQPSPGTSAPGHALHGKKNSTVDCNGVVSLGAGDPEATSPGSHLLRP  
VMLEHPPDTTTPSEEPGGPQMLTSQAPCVDGFEEPGARQRALS AVSVLTSALEEL  
EESRHKCPPCWNR LAQRYLIWECCPLWMSIKQGVKLVMDPFTDLTITMCIVLNTLF  
MALEHYNMTSEFEEMLQVGNLVFTGIFTAEMTFKIIALDPYFFFQGGWNIFDSIIVILS  
LMELGLSRMSNLSVLR SFRLRVFKLAKSWPTLNTLIKIIGNSVGALGNLTLVLAIVFI  
FAVVGMLFGKNYSELRDSDSGLLPRWHMMDFFHAFLIIFRILCGEWIETMWDCME  
VSGQSLCLLVFLLVMVIGNLVVNLFLALLSSFSADNLTAPDEDREMNNLQLALARI  
QRGLRFVKRTTWDFCCGLLRQRPQKPAALAAQGQLPSCIATPYSPPPPETEKVPP  
TRKETRFEEGEQPGQGTPGDPEPVCVPIAVAESDTDDQEEDEENSLGTEEESSKQ  
QESQPVSGGPEAPPDSRTWSQVSATASSEAEASASQADWRQQWKAEPQAPGCG  
ETPEDSCSEGSTADMTNTAELLEQIPDLGQDVKDPEDCFTEGCVRRCPCCAVIDTT  
QAPGKVVWR LRKTCYHIVEHSWFETFIIFMILLSSGALAFEDIYLEERKTIKVLLEYA  
DKMFTYVFLVLEMLLKWVAYGFKKYFTNAWCWLDLIVDVSLVSLVANTLGFAEMGPI  
KSLRTLRLRPLRALS RFEGMRVVNALVGAIPSIMNVLLVCLIFWLIFSIMGVNLFAG  
KFGRCINQTEGDLPLNYTIVNKSQCESLNTGELYWTKVKVNF DNVGAGYLALLQ  
VATFKGWMDIMYAAVDSRGYEEQPQWEYNLYMYIYFVIFIFGSFFTLNLFIVIIDNF  
NQQKKKLGGQDIFMTEEQKKYYNAMKKLGSKKPQKPIRPLNKYQGFIFDIVTKQA  
FDVTIMFLICLNMTMMVETDDQSPEKINILAKINLLFVAIFTGECIVKLAALRHYYFTN  
SWNIFDFVVVILSIVGTVLSDIIQKYFFSPTLFRVIRLARIGRILRLIRGAKGIRTL LFALM  
MSLPALFNIGLLLFLVMFIYSIFGMANFAYVKWEAGIDDMFNFTFANSMLCLFQITTS  
AGWDGLLSPILNTGPPYCDPTLPNSNGSRGDCGSPAVGILFFTTYIIISFLIVVNMYIAI  
ILENFSVATEESTEPLSEDDFDMFYEIWEKFDPEATQFIEYSVLSDFADALSEPLRIAK  
PNQISLINMDLPMVSGDRIHCMDILFAFTKRVLGESGEMDALKIQMEEKFMAANPSK  
ISYEPITTTLRRKHEEVSAMVIQRAFRRHLLQRSLKHASFLFRQQAGSGLSEEDAPE  
REGLIAYVMSENF SRPLGPPSSSSISSTSFPFSDSVTRATSDNLQVRGSDYSHSE  
DLADFPPSPDRDRESIV

Position: 1656

Substitution: AA1-A; AA2-D

## Results:

| Prediction Model | Score       |             | Prediction Report        |
|------------------|-------------|-------------|--------------------------|
|                  | Sensitivity | Specificity |                          |
| HumDiv           | 1.000       |             | <b>Probably Damaging</b> |
|                  | 0.00        | 1.00        |                          |
| HumVar           | 0.999       |             | <b>Probably Damaging</b> |
|                  | 0.09        | 0.99        |                          |

## 2. SIFT

### Protein query sequence:

>NP\_932173.1 sodium channel protein type 5 subunit alpha isoform a  
[Homo sapiens]

MANFLLPRGTSSFRRFTRESLAAIEKRMAEKQARGSTTLQESREGLPEEEAPRPQL  
DLQASKKLPDLYGNPPQELIGEPLEDLDPFYSTQKTFIVLNKGKTIFRFSATNALYVL  
SPFHPIRRAAVKILVHSLFNMLIMCTILTNCVFMAQHDPWPWKYVEYTFTAIYTFESL  
VKILARGFCLHAFTFLRDPWNWLDVSVIIMAYTTEFVDLGNVSALRTFRVLRALKTIS  
VISGLKTIVGALIQSVKKLADVMVLTVFCLSVFALIGLQLFMGNLRHKCVRNFTALNG  
TNGSVEADGLVWESLDLYLSDPENYLLKNGTSDVLLCGNSSDAGTCPEGYRCLKA  
GENPDHGYTSFDSFAWAFLALFRLMTQDCWERLYQQTLRSAGKIYMIFFMLVIFLG  
SFYLVNLLAVVAMAYEEQNQATIAETEEKEKRFQEAMEMLKKEHEALTIRGVDTVS  
RSSLEMSPLAPVNSHERRSKRRKRMSSGTEECGEDRLPKSDSEDGPRAMNHL  
SLTRGLSRTSMKPRSSRGSIFTFRRRDLGSEADFADDENSTAGESESHHTSLLVPWPL  
RRTSAQQQPSPGTSAPGHALHGKKNSTVDCNGVVSLLGAGDPEATSPGSHLLRP  
VMLEHPPDTTTPSEEPGGPQMLTSQAPCVDGFEEP GARQRALS AVSVLTSALEEL  
EESRHKCPPCWNRLAQRyliweccplwmsikqgvklvmdpftdltitmcivlntlf  
MALEHYNMTSEFEEMLQVGNLVFTGIFTAEMTFKIIALDPY Y Y F Q Q G W N I F D S I I V I L S  
LMELGLSRMSNLSVLR SFRLRVFKLAKSWPTLNTLIKIIGNSV GALGNLTLVLAIVFI  
FAVGMQLFGKNYSEL R D S D S G L L P R W H M M D F F H A F L I I F R I L C G E W I E T M W D C M E  
VSGQSLCLLVFLLVMVIGNLVVNLFLALLLSSFSADNLTAPDEDREMNNLQLALARI  
QRGLRFVKRTTWDFCCGLLRQRPQKPAALAAQGQLPSCIATPYSPPPPETEKVPP  
TRKETRFEEGEQPGQGTGDPPEPVCVPIAVAESDTDDQEEDENSLGTEEESSKQ  
QESQPVSSGGPEAPPDSRTWSQVSATASSEAEASASQADWRQQWKAEPQAPGCG  
ETPEDSCSEGSTADMTNTAELLEQIPDLGQDVKDPEDCFTEGCVRRCPCCA V D T T  
QAPGKVVWR LRKTCYHIVEHSWFETFIIFMILLSSGALAFEDIYLEERKTIKVLL EYA  
DKMFTYVFVLEMLLKWVAYGFKKYFTNAWCWLD FLIVDVSLVSLVANTLGFAEMGPI  
KSLRTL RALRPLRALS RFEGMRVVNALVGAIPSIMNVLLVCLIFWLIFSIMGVNL FAG  
KFGRCINQTEGDLPLNYTIVNNKSQCESLNTGELYWTKVKVNF DN VGAGYLALLQ  
VATFKGWMDIMYAAVDSRGYEEQPQWEYNLYMYIYFVIFIIFGSFFTLNLFIGVIIDNF  
NQQKKKLGGQDIFMTEEQKKYYNAMKKLGSKKPQKPIRPLNKYQGFIFDIVTKQA  
FDVTIMFLICLNMTMMVETDDQSPEKINILAKINLLFVAIFTGECIVKLAALRHYYFTN  
SWNIFDFVVVILSIVGTVLSDI IQKYFFSPTLFRVIRLARIGRILRLIRGAKGIRTL LFALM  
MSLPALFNIGLLLFLVMFIYSIFGMANFAYVKWEAGIDDMFNFQTFANSMLCLFQITTS  
AGWDGLLSPILNTGPPYCDPTLPNSNGSRGDCGSPAVGILFFTTYIIISFLIVVNMYIAI  
ILENFSVATEESTEPLSEDDFDMFYEIWEKFDPEATQFIEYSVLSDFADALSEPLRIAK  
PNQISLINMDLPMVSGDRIHCMDILFAFTKRVLGESGEMDALKIQMEEKFMAANPSK  
ISYEPITTTLRKHEEVSAMVIQRAFRRHLLQRSLKHASFLFRQQAGSGLSEEDAPE  
REGLIAYVMSENF SRPLGPPSSSSISSTSFPPSYDSVTRATSDNLQVRGSDYSHSE  
DLADFPPSPDRDRESIV

The substitutions of interest: A1656D

Database to search: UniProt-SwissProt + TrEMBL 2010\_09

Median conservation of sequences: 3.00

Remove sequences more than (90) percent identical to query

### Results:

Substitution at pos 1656 from A to D is predicted to AFFECT PROTEIN FUNCTION  
with a score of 0.00.

Median sequence conservation: 3.04

Sequences represented at this position: 129

\*Amino acids with probabilities <0.05 are predicted to be deleterious.
